# Supplementary material for: Phenazine-based spiroborate complex with enhanced electrochemical stability for lithium storage
Source: Royal Society of Chemistry journal article supplement (doi:10.1039/d1nj04461c), 2021-01-01
Supplement: d1nj04461c1.pdf [file d1nj04461c1.pdf]

## Supporting Information

### Phenazine-based Spiroborate Complex with Enhanced Electrochemical Stability for Lithium Storage

Ying Hua,<sup>a</sup> Yuanzhu Huang,<sup>a</sup> Yujie Wang,<sup>a</sup> Ya Du,<sup>b</sup> and Haishen Yang<sup>\*a</sup>

a. Shanghai Key Laboratory of Materials Protection and Advanced Materials in Electric Power, College of Environmental and Chemical Engineering, Shanghai University of Electric Power, Shanghai 200090, China. E-mail: yanghsh@shiep.edu.cn

b. Institute of Advanced Synthesis, School of Chemistry and Molecular Engineering, Nanjing Tech University, Nanjing 211816, China. E-mail: ias\_ydu@njtech.edu.cn

#### Reagents

O-Phenylene diamine (99%), 2,5-dihydroxy-p-benzoquinone (98%), lithium hydroxide (99%), orthoboric acid (99%), phosphorus (V) oxide (P<sub>2</sub>O<sub>5</sub>, 98%), ethanol (EtOH, 99.7%), methanol (MeOH, 99.5%), hexane (97%), diethyl ether (99.5%), ethyl acetate (99.5%), tetrahydrofuran (THF, 99%) was purified by distillation prior to use.

#### Materials characterizations

The prepared compounds were confirmed by nuclear magnetic resonance (NMR) using a 400 MHz Bruker. The Fourier Transform infrared spectroscopy (FT-IR) spectra of **DHP** and **LDPB** were recorded on PerkinElmer Spectrum Two, and the wavenumber from 400 cm<sup>-1</sup> to 4000 cm<sup>-1</sup>. The TGA profiles of the **DHP** and **LDPB** was measured carried out METTLER TGA2 model with a temperature ramp of 10 °C min<sup>-1</sup> from 30 °C to 800 °C under a N<sub>2</sub> atmosphere. The Powder X-ray diffraction of **DHP** and **LDPB** were conducted on Smartlab (3KW). Scanning electron microscopes (SEM) is measured on Quanta FEG 250. The ex-situ XPS spectra of **LDPB** was tested on Thermo Scientific K-Alpha. The discharge and recharge of **LDPB** were measured by ex-situ FT-IR and XPS after the first discharge and a complete cycle, respectively. Before the ex-situ FT-IR and XPS test, the batteries were disassembled in an argon-filled glovebox, the collected samples were gently washed with DOL (about 5 mL) and dried at 60 °C for 12 h in a vacuum drying oven.

#### Materials preparation

Synthesis of 2,3-dihydroxyphenazine (**DHP**).<sup>[1]</sup> Add o-phenylene diamine (3.57 mmol; 1 eq) and 2,5-dihydroxy-p-benzoquinone (7.14 mmol; 2 eq) to 386 mL ethanol solution. After the mixture was heated to reflux at 85 °C for 1.5 h, the ethanol was distilled off under reduced pressure. The residue was absorbed with a small amount of THF, and filtered with a sand core funnel. The filter cake was dried overnight in a vacuum drying oven (50 °C) to obtain a crude product. The crude product was recrystallized with ethyl acetate to obtain a pure product. Yield: 70%. FT-IR  $\nu_{\text{max}}$  / cm<sup>-1</sup> 2703(O-H), 1508~1603(C=C), 1442(C-N), 1143~1307(C-O), 746~906(C-H), 586(benzene ring). <sup>1</sup>H NMR (400 MHz, DMSO-d<sub>6</sub>)  $\delta$  7.19 (s, 2H); 7.71 (d, 2H); 8.02 (d, 2H).

Synthesis of lithium bis(2,3-dihydroxyphenazine) borate (**LDPB**).<sup>[2]</sup> **DHP** (1.41 mmol; 2 eq) and lithium hydroxide (0.71 mmol; 1 eq) were dissolved in 1.2 mL methanol solution to make the system uniform. Add boric acid (0.71 mmol; 1 eq), heat and stir at 60 °C. Methanol was distilled off under reduced pressure, the crude residue was absorbed with 1~2 mL THF, the desired product was precipitated with n-hexane (~3 mL), and the solvent was removed by suction filtration. The filter cake was washed successively with n-hexane and anhydrous ether. The

filter cake was vacuum dried (30 °C) overnight on P<sub>2</sub>O<sub>5</sub> to obtain a crude product. The crude product was recrystallized with anhydrous ether for a long time and then filtered again with suction. The filter cake was vacuum dried with phosphorus pentoxide to obtain a pure product. Yield: 65%. FT-IR  $\nu_{\text{max}}$  / cm<sup>-1</sup> 1508~1603 (C=C), 1442 (C-N), 1213~1312 (C-O), 1044 (B-O), 746~906 (C-H), 586 (benzene ring).

#### **Electrochemical measurements**

**DHP** and **LDPB** as the cathode active material are assembled from 2016 coin cell in a glove box filled with argon. Contains active materials (30 wt %), CMK-3 (60 wt %), 10 wt % PVDF binder in N-methyl-2-pyrrolidone (NMP). After ball milling the mixture for 2 hours, use a 200  $\mu\text{m}$  thickness applicator to coat it on a 16  $\mu\text{m}$  thickness single-gloss aluminum foil, and dry it in a vacuum drying oven at 80 °C for 12 hours. The dried pole piece was cut into circular slices with a diameter of 14 mm with a manual punching machine, and the active material loading was 0.4 mg cm<sup>-2</sup>. The battery is assembled with a 14 mm diameter lithium sheet as the anode, polypropylene film (Celgard 2400) as the separator, 1 M LiTFSI DOL/DME (1:1 v/v) as electrolyte. Electrochemical cyclic voltammetry (CV) and electrochemical impedance spectroscopy (EIS) were both instructed on electrochemical workstation (CHI660E) using the coin cells. The charge/discharge cycles were carried out on a Neware Battery Test System. All the electrochemical tests were performed at room temperature.

## Supporting Figures

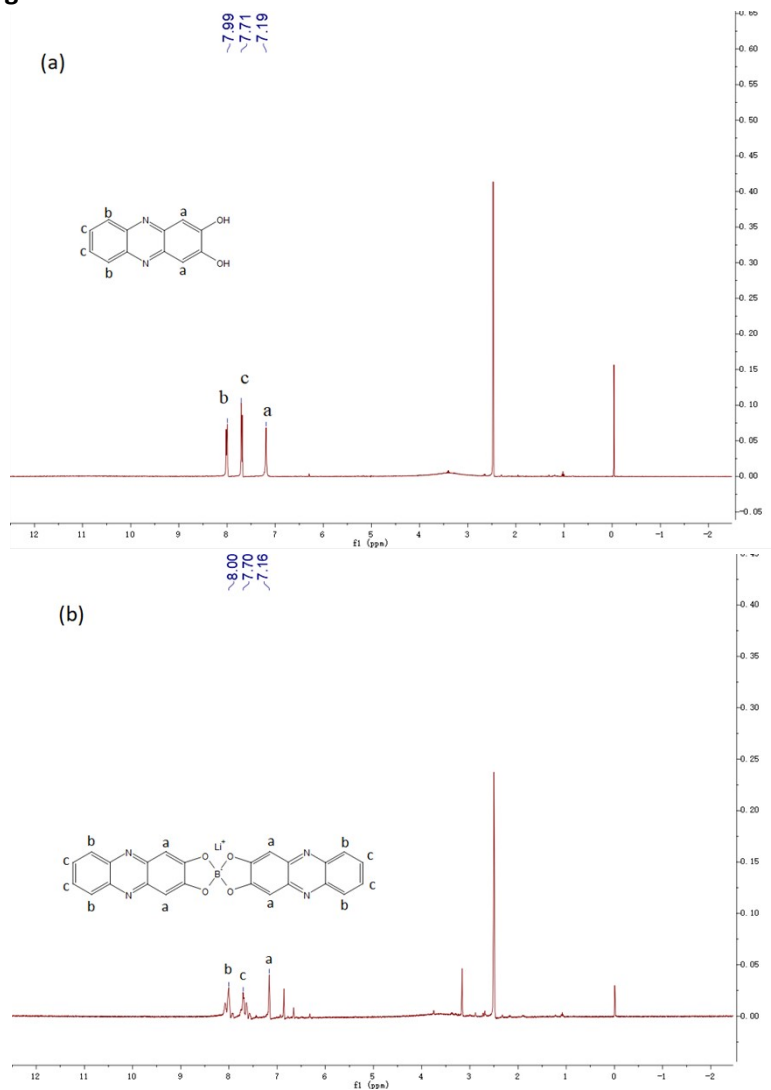

Fig. S1 (a) DHP  $^1\text{H}$  NMR; (b) LDPB  $^1\text{H}$  NMR.

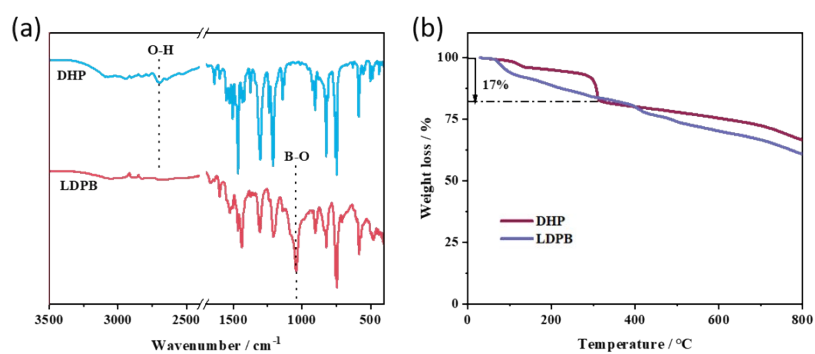

Fig. S2 (a) Ex-situ FT-IR diagram of LDP and LDPB; (b) Thermal gravimetric analysis (TGA) diagram of DHP and LDPB.

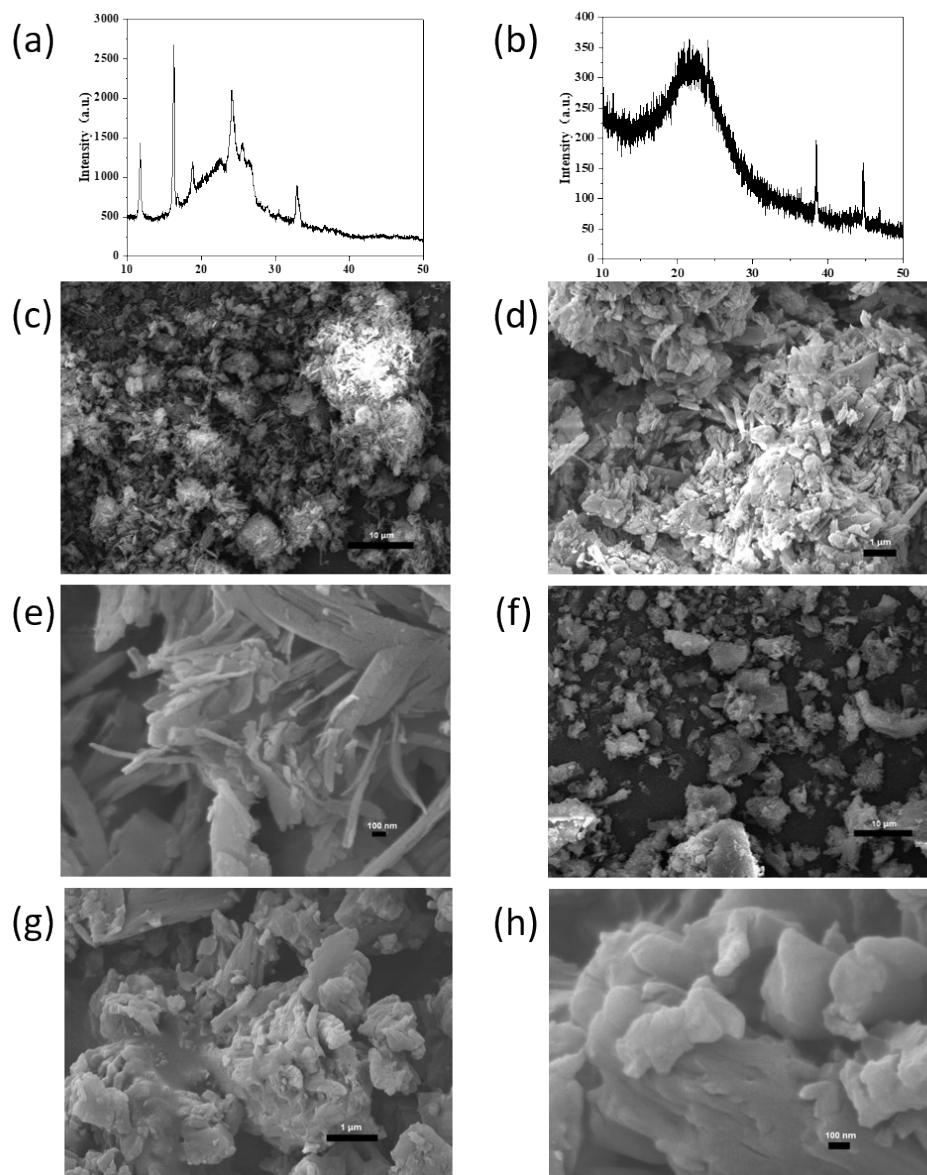

**Fig. S3** (a) and (b) are the PXRD patterns of **DHP** and **LDPB**, respectively; (c), (d) and (e) are the SEM patterns of **DHP**; (f), (g) and (h) are the SEM patterns of **LDPB**.

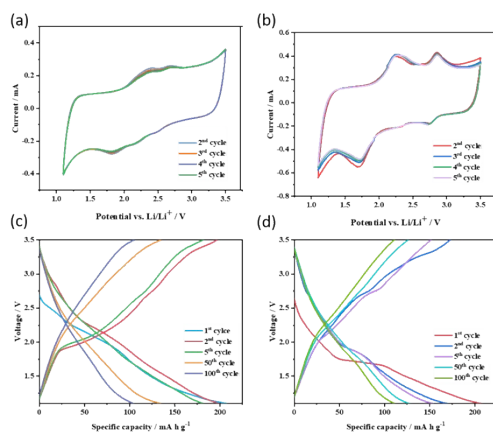

**Fig. S4** (a) and (b) are CV graphs of **DHP** and **LDPB** at a sweeping speed of  $2.0 \text{ mV s}^{-1}$ ; (c) and (d) are the galvanostatic charge/discharge profiles of **DHP** and **LDPB** electrodes under 1st, 2nd, 5th, 50th, 100th, respectively. Current:  $200 \text{ mA g}^{-1}$ . Electrolyte:  $1 \text{ M LiPF}_6 \text{ EC/DMC (1:1 v/v)}$ .

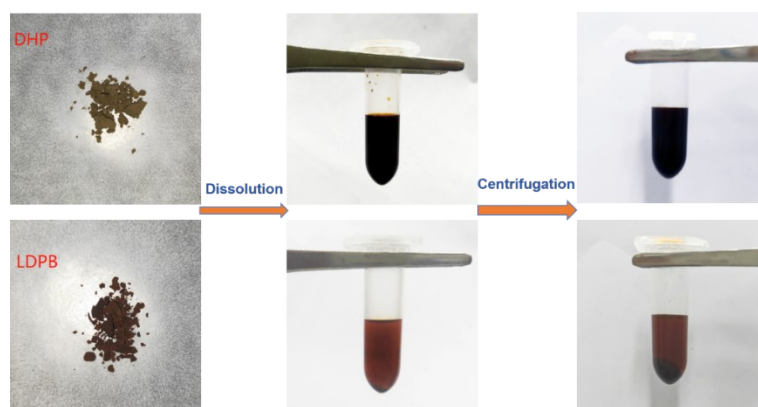

**Fig. S5** The solubility of **DHP** and **LDPB** (5 g/L) in a solution of 1 M LiTFSI DOL/DME (1:1 v/v).

In this figure, we can see that when the same amount of **DHP** and **LDPB** (5 mg) are added to the same amount of electrolyte (1 mL) and centrifuged, **DHP** is dissolved in the electrolyte. In contrast, **LDPB** is only partially dissolved, and there is a precipitate at the bottom. This shows that the solubility of **LDPB** in the electrolyte is significantly lower than that of **DHP**, which explains the improvement of **LDPB**'s cycle performance.

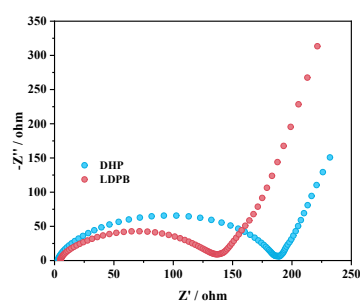

**Fig. S6** Electrochemical impedance spectra (EIS) for **DHP** and **LDPB**.

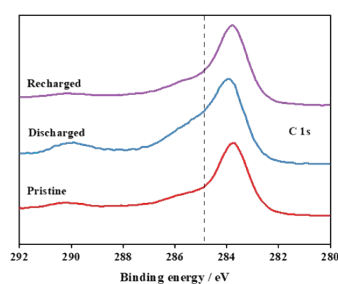

**Fig. S7** XPS characterization of C 1s region.

- 1 Olivier S , Claire S . EP2078720 A1, 2009 .
- 2 M. J. Sevrin, L. Furst, J. D. Nguyen, J. L. Collins and C. R. J. Stephenson, *Tetrahedron*, 2018, **74**, 3246-3252.
